# Supplementary material for: Isolation, Characterization, Genome Annotation, and Evaluation of Tyrosinase Inhibitory Activity in Secondary Metabolites of Paenibacillus sp. JNUCC32: A Comprehensive Analysis through Molecular Docking and Molecular Dynamics Simulation
Source: MDPI journal article supplement (doi:10.3390/ijms25042213), 2024-02-12
Supplement: s1 [file s1]

# **Isolation, Characterization, Genome Annotation, and Evaluation of Tyrosinase Inhibitory Activity in Secondary Metabolites of *Paenibacillus* sp. JNUCC32: A Comprehensive Analysis through Molecular Docking and Molecular Dynamics Simulation**

**Yang Xu, Xuhui Liang and Chang-Gu Hyun \***

Department of Beauty and Cosmetology, Jeju Inside Agency and Cosmetic Science Center, Jeju National University, Jeju 63243, Republic of Korea

\* Correspondence: [cghyun@jejunu.ac.kr](mailto:cghyun@jejunu.ac.kr); Tel.: +82-64-754-1803

## Supplementary materials

$^1\text{H}$  NMR,  $^{13}\text{C}$  NMR, RMSD, ADMET

## CONTENTS

|                                                                                            |    |
|--------------------------------------------------------------------------------------------|----|
| Figure S1. Validation of docking parameters of co-crystallized ligand and tryptophol ..... | 1  |
| Figure S2. <sup>1</sup> H NMR of compound 1 .....                                          | 2  |
| Figure S3. <sup>13</sup> C NMR of compound 1.....                                          | 3  |
| Figure S4. <sup>1</sup> H NMR of compound 2 .....                                          | 4  |
| Figure S5. <sup>13</sup> C NMR of compound 2 .....                                         | 5  |
| Figure S6. <sup>1</sup> H NMR of compound 3 .....                                          | 6  |
| Figure S7. <sup>13</sup> C NMR of compound 3 .....                                         | 7  |
| Figure S8. <sup>1</sup> H NMR of compound 4 .....                                          | 8  |
| Figure S9. <sup>13</sup> C NMR of compound 4.....                                          | 9  |
| Figure S10. <sup>1</sup> H NMR of compound 5 .....                                         | 10 |
| Figure S11. <sup>13</sup> C NMR of compound 5 .....                                        | 11 |
| Figure S12. <sup>1</sup> H NMR of compound 6 .....                                         | 12 |
| Figure S13. <sup>13</sup> C NMR of compound 6 .....                                        | 13 |
| Figure S14. <sup>1</sup> H NMR of compound 7 .....                                         | 14 |
| Figure S15. <sup>13</sup> C NMR of compound 7 .....                                        | 15 |
| Table S1. The ADMET properties of the compounds.....                                       | 16 |

**Figure S1.** Validation of docking parameters of co-crystallized ligand and tryptophol. Yellow (before docking), blue (after docking).

|                                                                                   |                                                                                     |
|-----------------------------------------------------------------------------------|-------------------------------------------------------------------------------------|
| 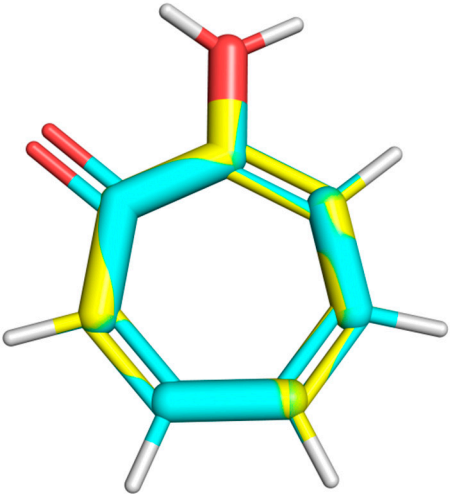 |  |
| RMSD: 0.001Å                                                                      | RMSD: 0.002Å                                                                        |
| co-crystallized ligand                                                            | Tryptophol                                                                          |

Tryptophol

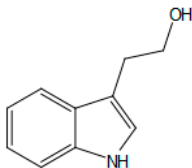

Figure S3.  $^{13}\text{C}$  NMR of compound 1

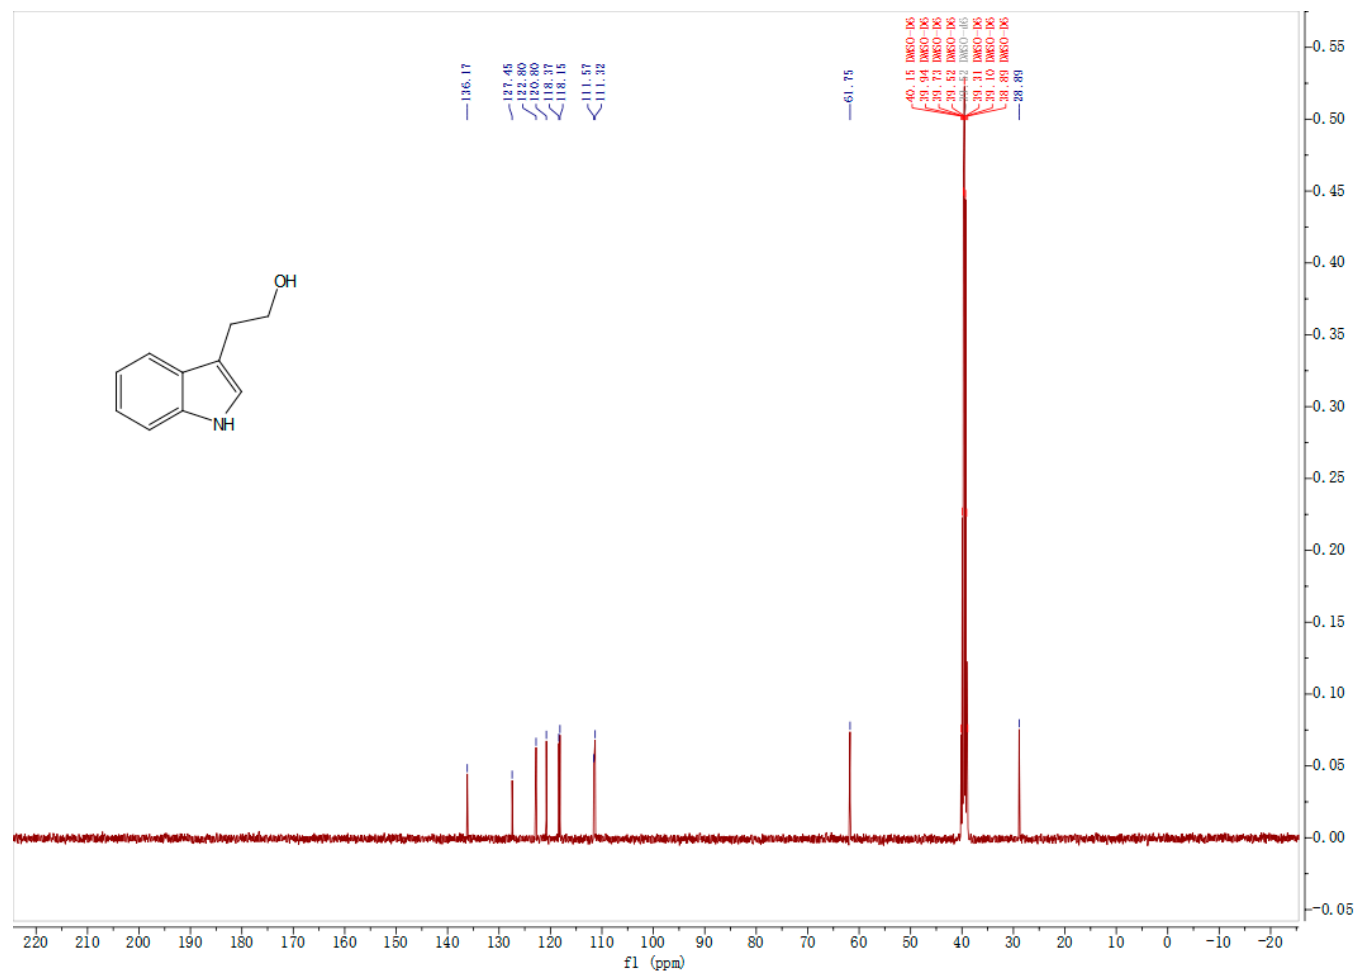

**Figure S4.**  $^1\text{H}$  NMR of compound **2**  
3-(4-Hydroxyphenyl)propionic acid

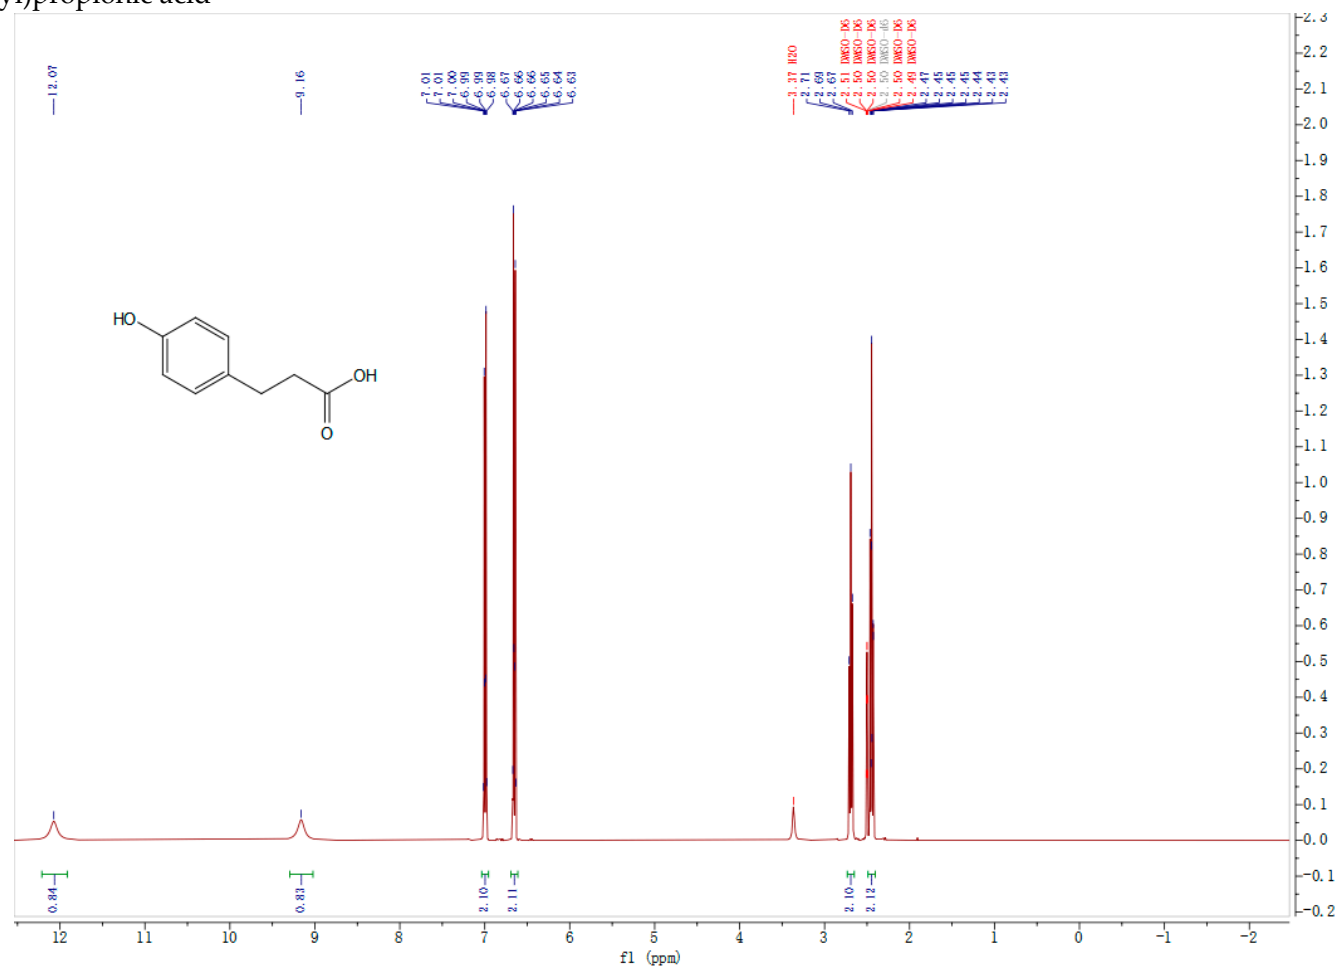

Figure S5.  $^{13}\text{C}$  NMR of compound 2

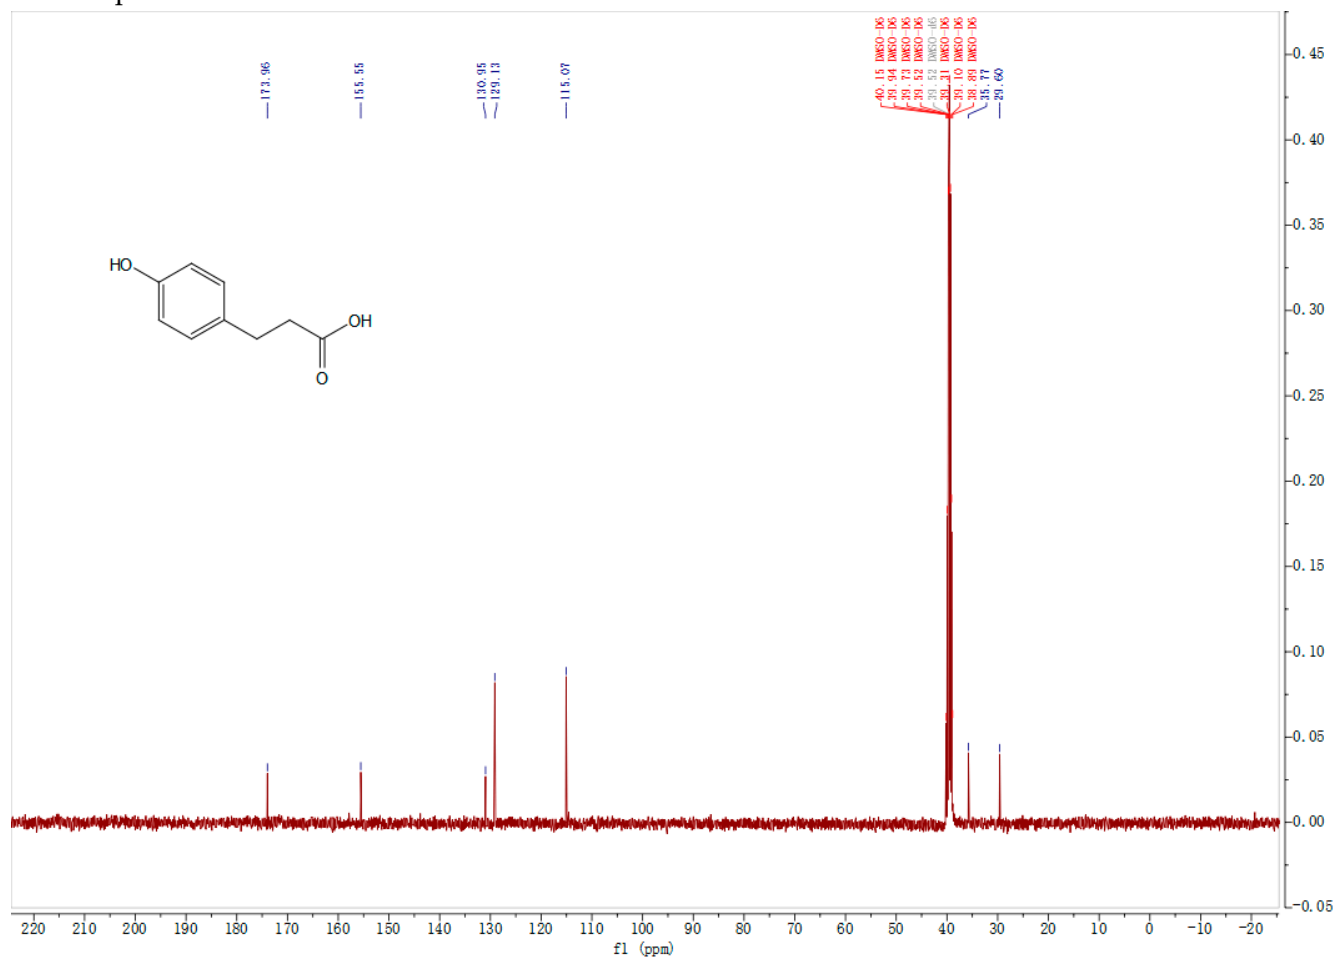

**Figure S6.**  $^1\text{H}$  NMR of compound 3

Ferulic acid

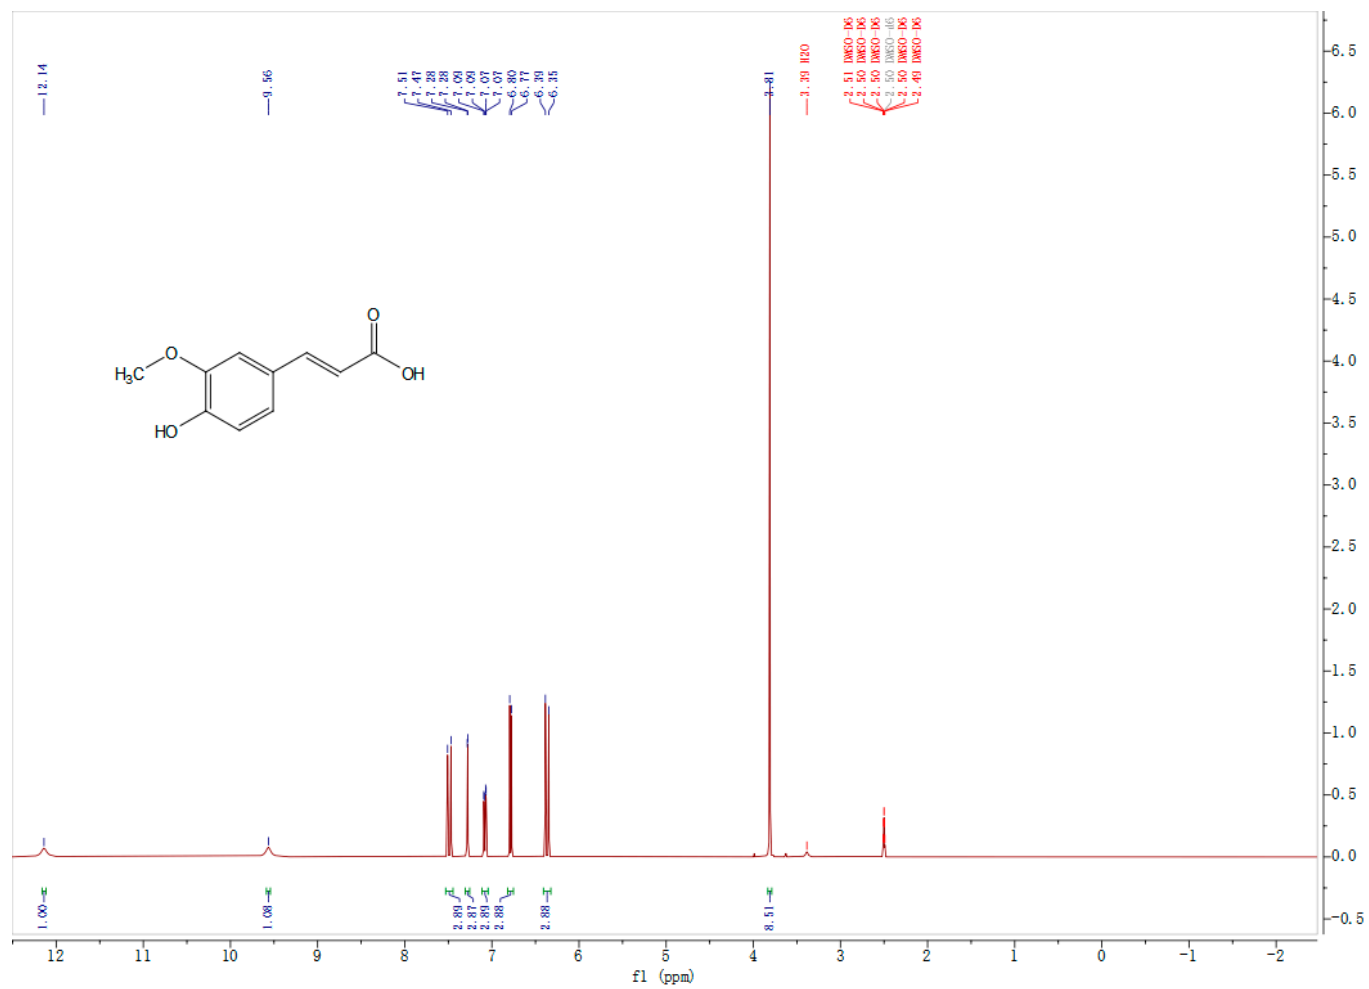

Figure S7.  $^{13}\text{C}$  NMR of compound 3

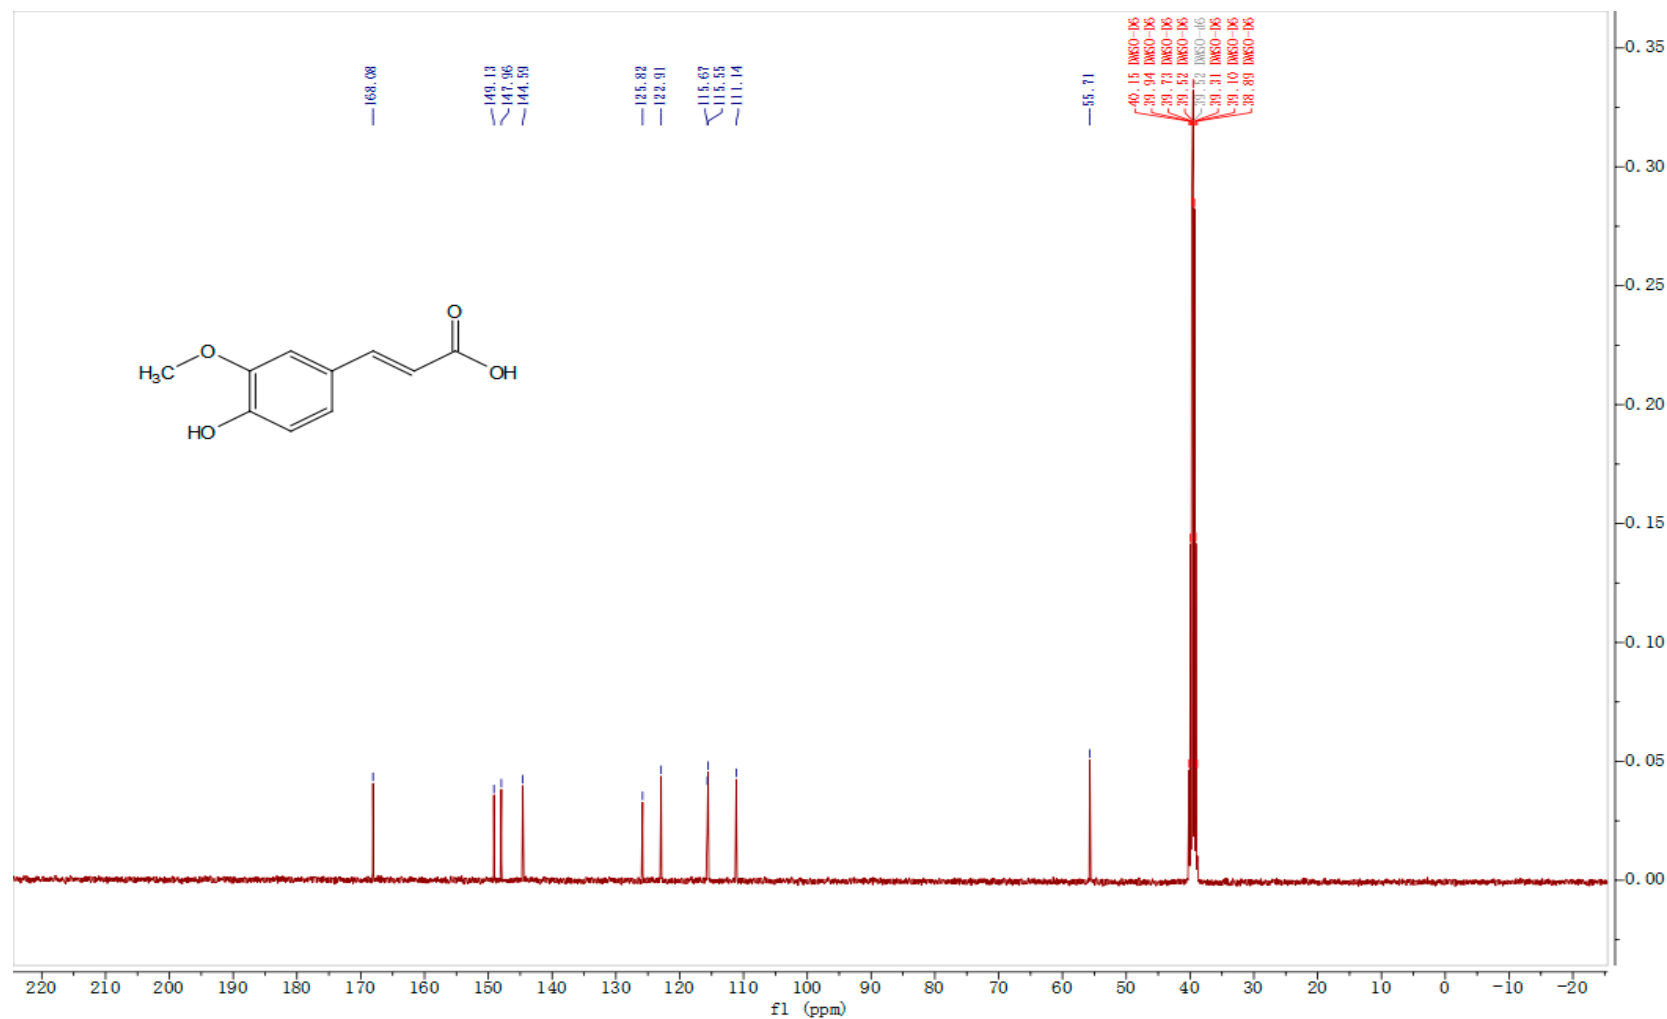

**Figure S8.**  $^1\text{H}$  NMR of compound **4**  
Maculosin

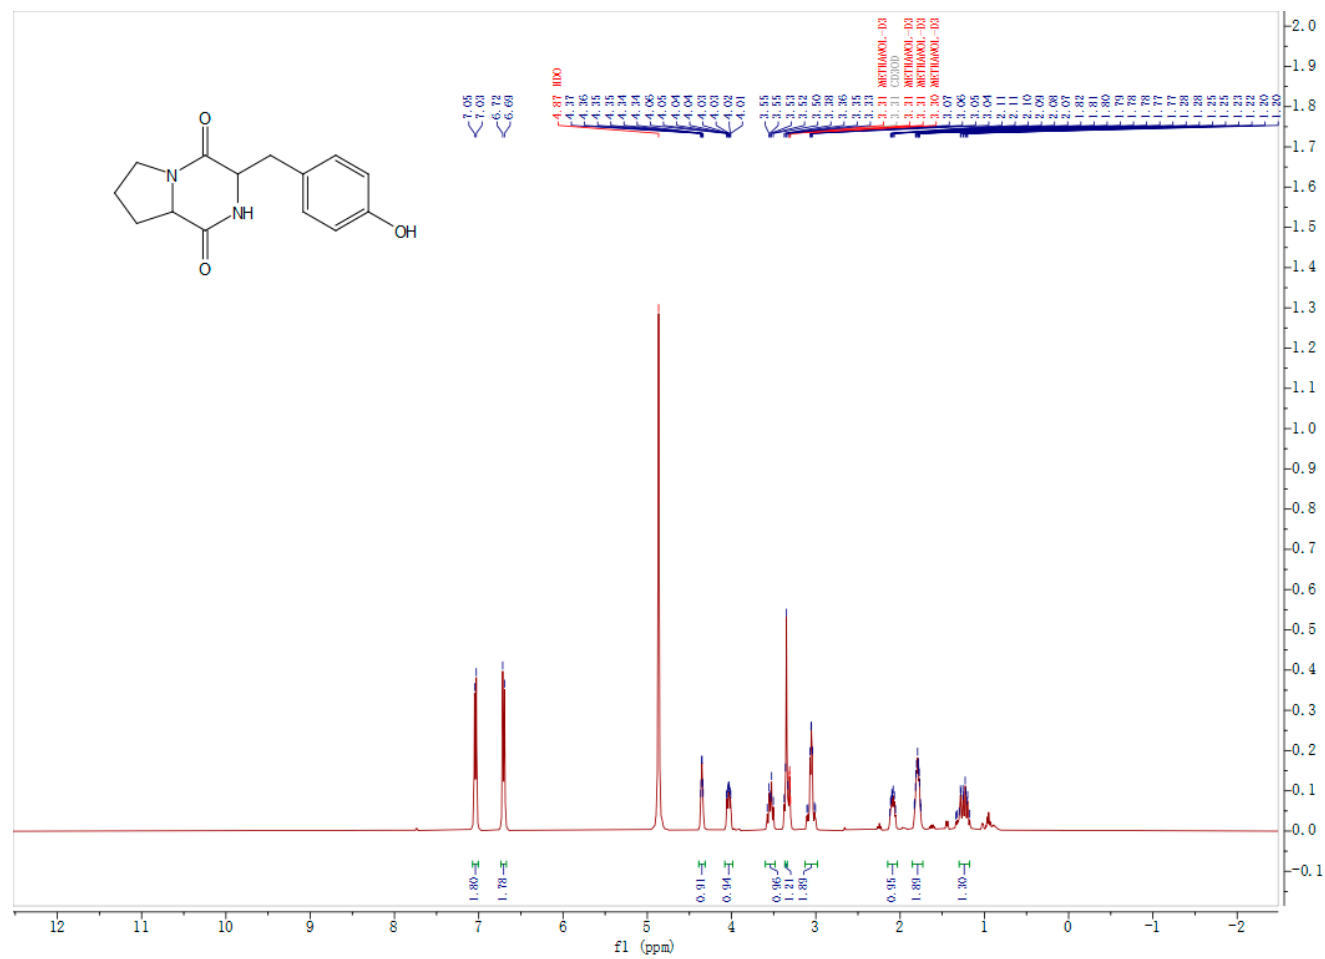

Figure S9.  $^{13}\text{C}$  NMR of compound 4

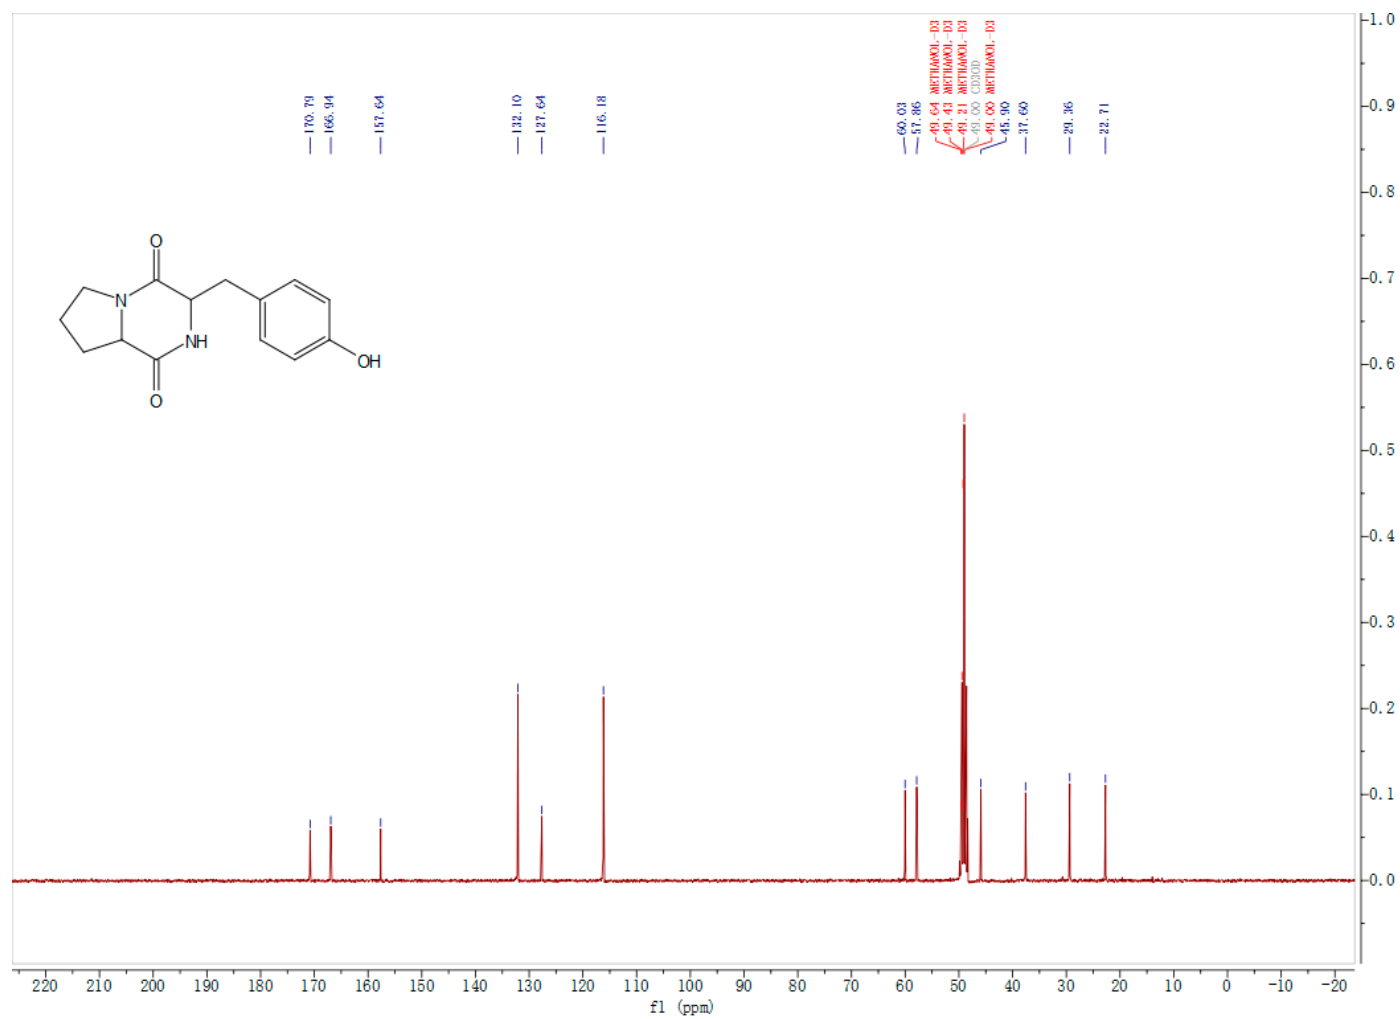

**Figure S10.**  $^1\text{H}$  NMR of compound **5**

Brevianamide F

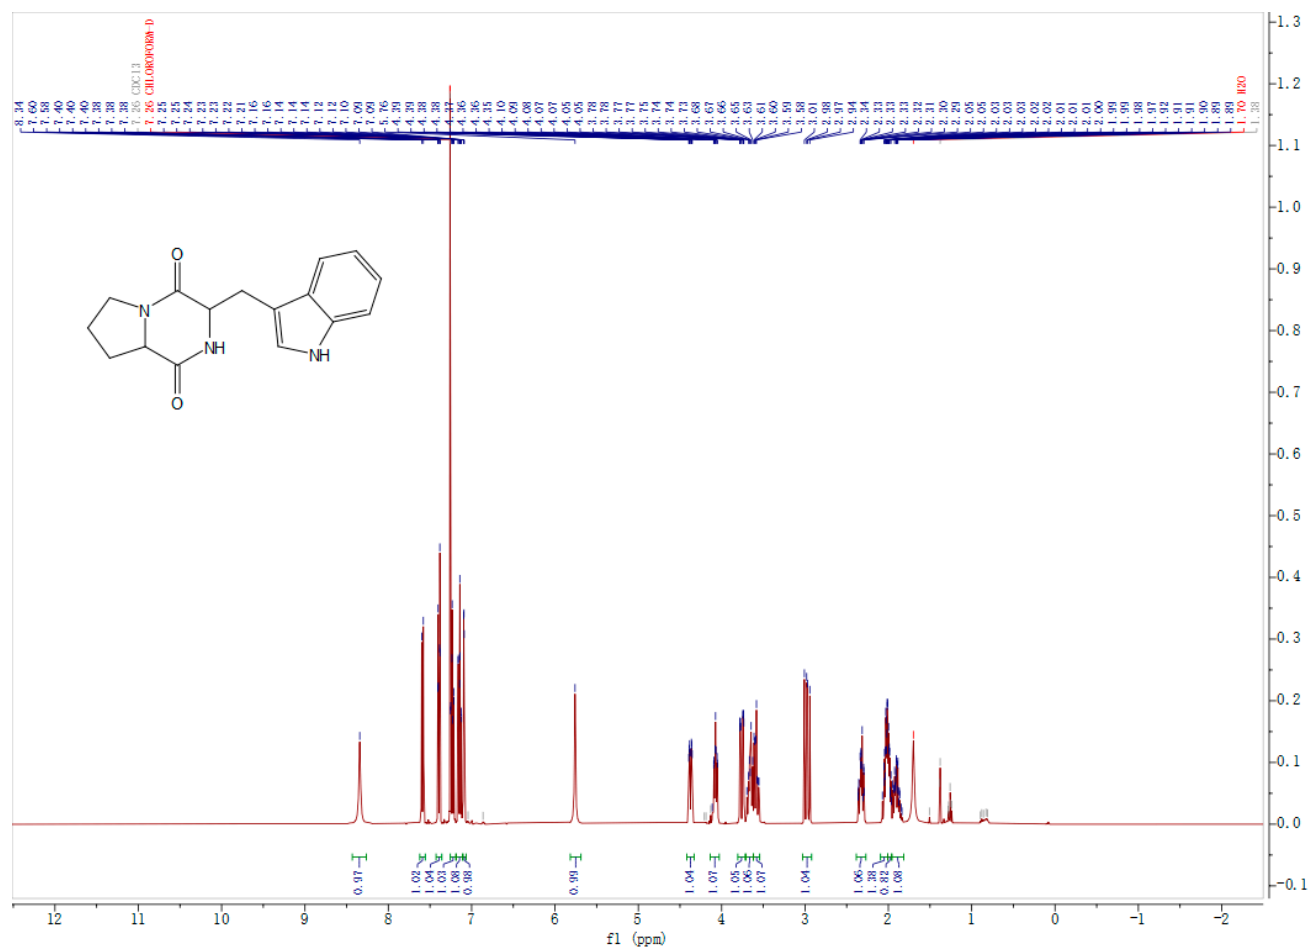

Figure S11.  $^{13}\text{C}$  NMR of compound 5

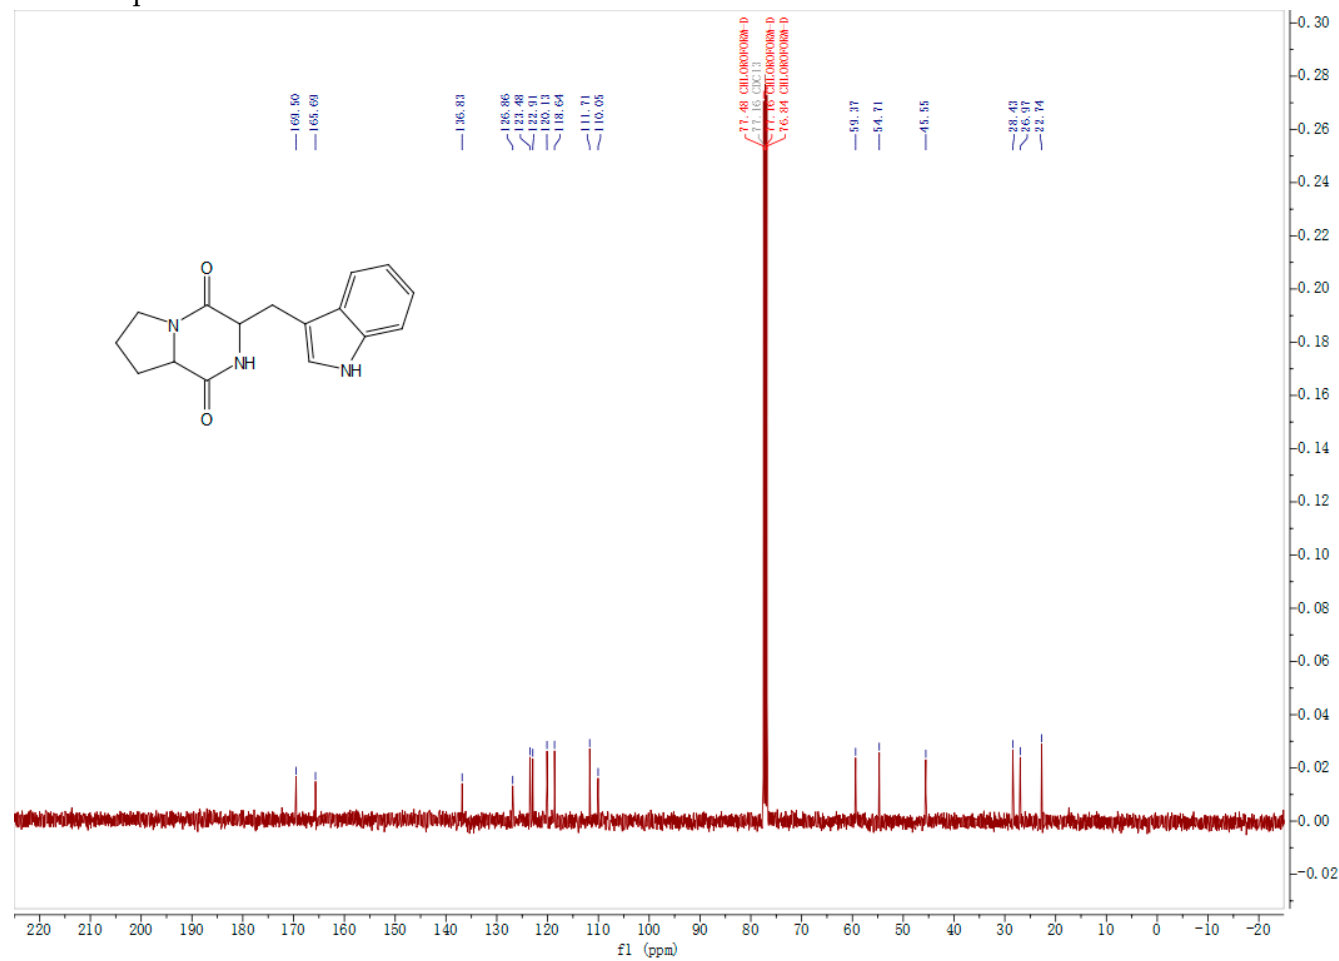

**Figure S12.**  $^1\text{H}$  NMR of compound **6**  
Indole-3-acetic acid

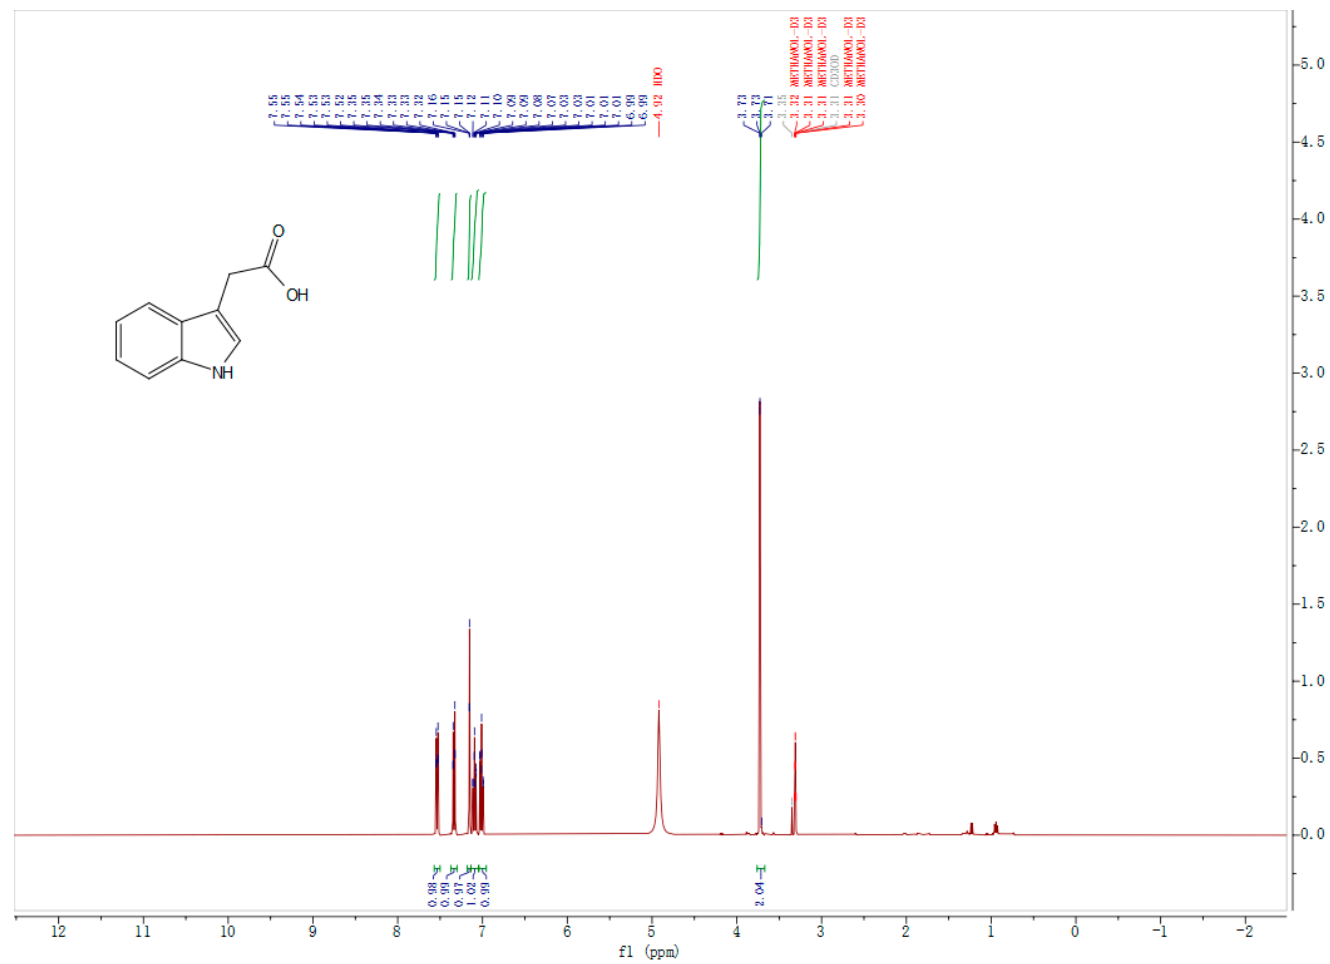

Figure S13.  $^{13}\text{C}$  NMR of compound 6

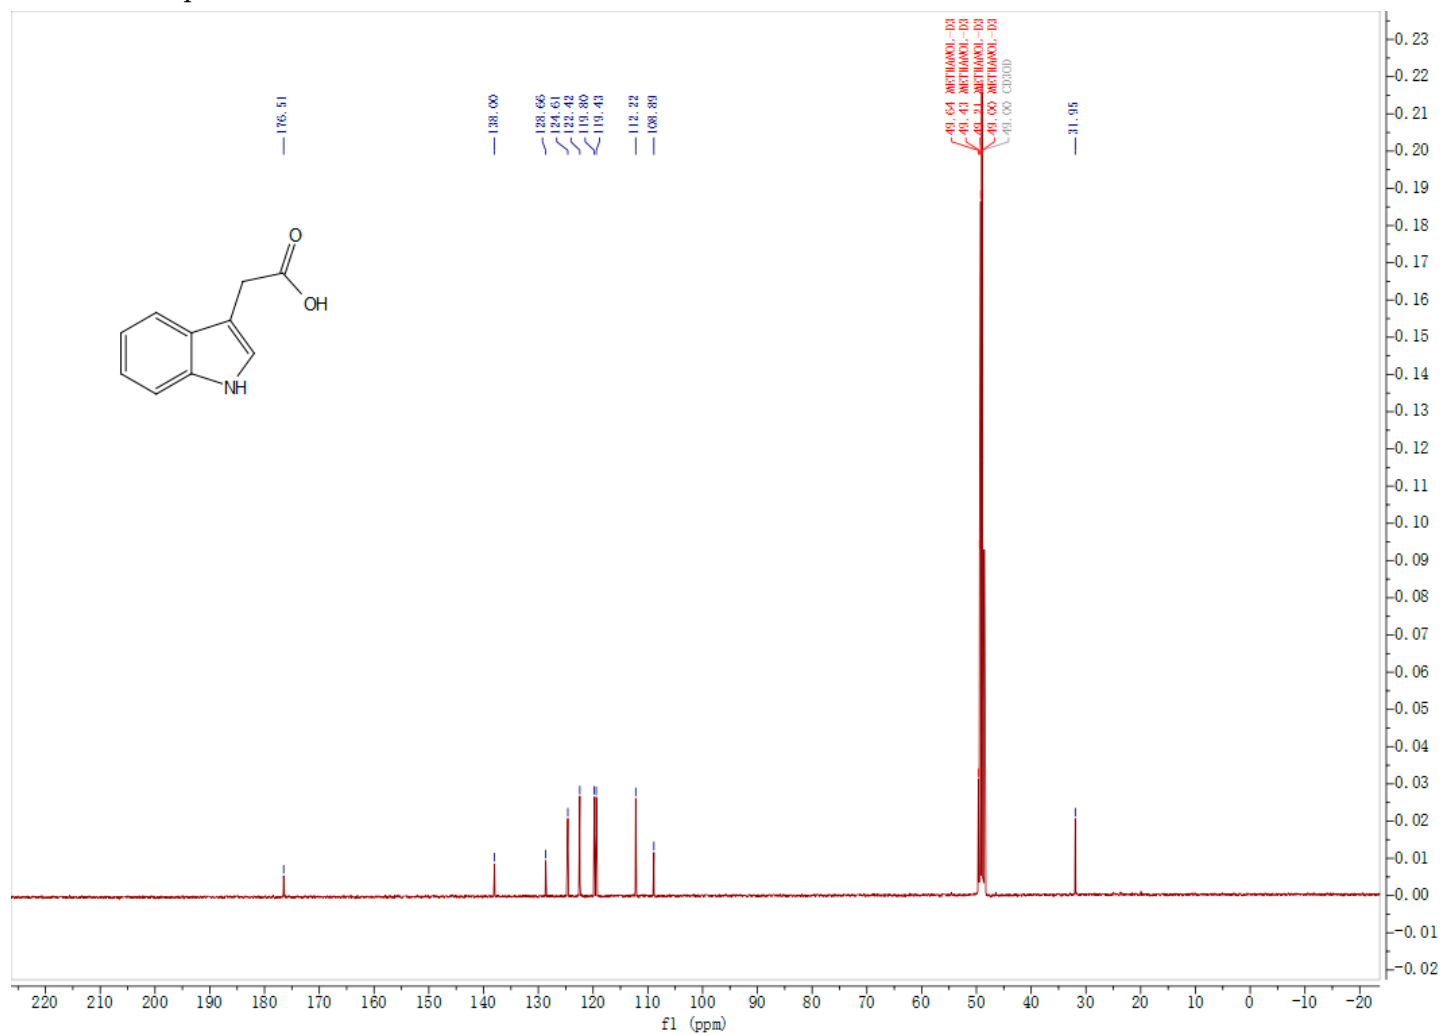

**Figure S14.**  $^1\text{H}$  NMR of compound 7  
Butyric acid

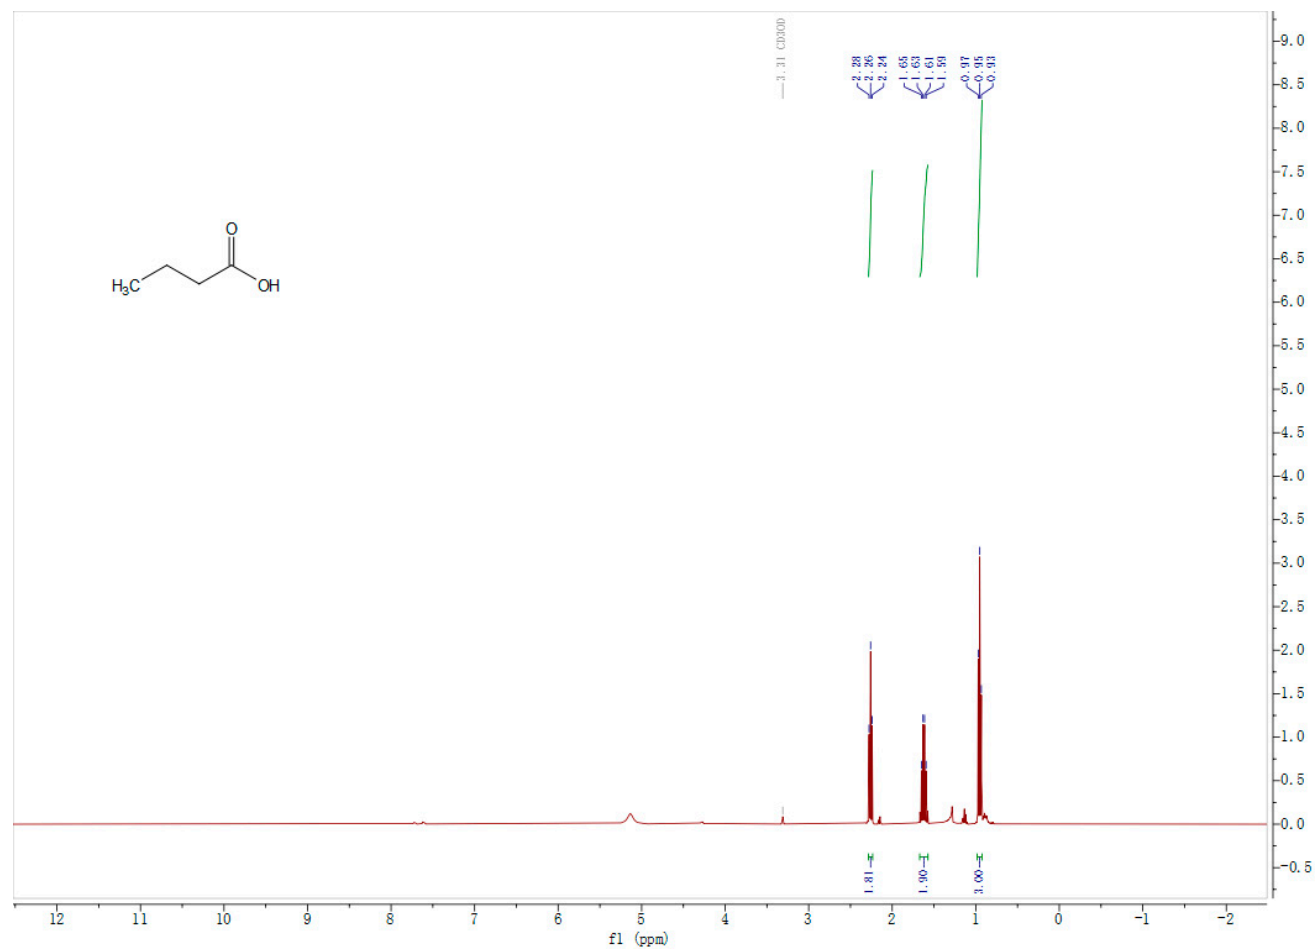

Figure S15.  $^{13}\text{C}$  NMR of compound 7

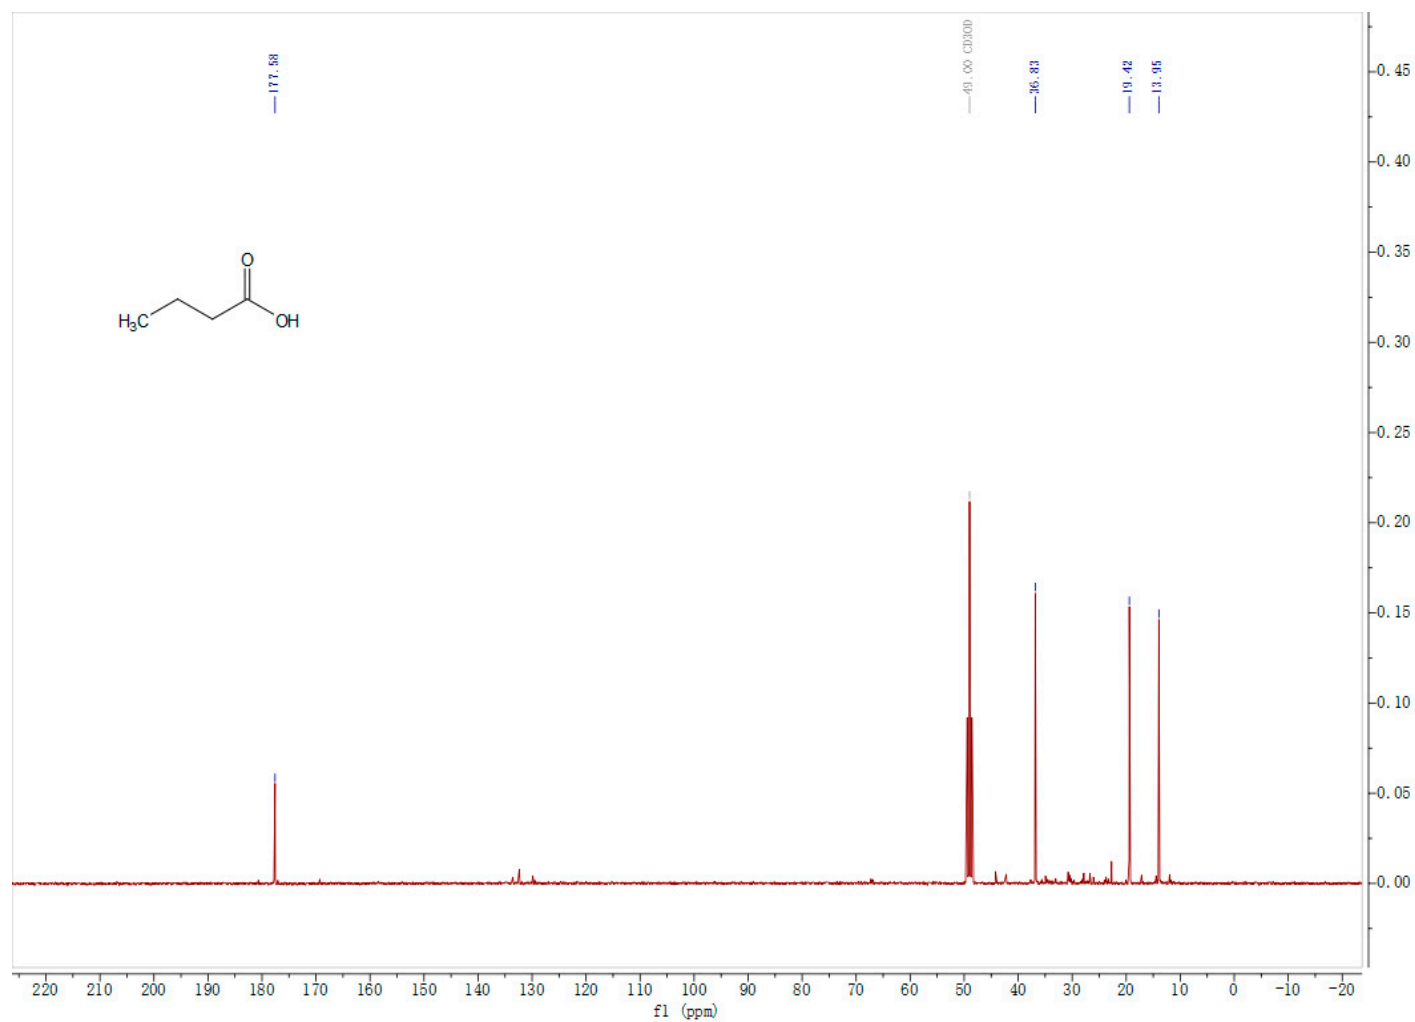

**Table S1.** The ADMET properties of the compounds.

| <b>ADMET properties</b>     | <b>Tryptophol</b> | <b>Tropolone</b> | <b>Kojic acid</b> | <b>Arbutin</b> |
|-----------------------------|-------------------|------------------|-------------------|----------------|
| Ames mutagenicity           | 0.66              | 0.81             | 0.77              | 0.81           |
| Acute oral toxicity         | 0.6983            | 0.6422           | 0.619             | 0.6959         |
| Caco-2 permeability         | 0.9205            | 0.9389           | 0.5133            | 0.7795         |
| CYP1A2 inhibition           | 0.6802            | 0.8122           | 0.9046            | 0.9469         |
| CYP2C19 inhibition          | 0.5736            | 0.8586           | 0.9025            | 0.8964         |
| CYP2C9 inhibition           | 0.5172            | 0.9629           | 0.907             | 0.8842         |
| CYP2C9 substrate            | 0.8129            | 1                | 0.8               | 1              |
| CYP3A4 inhibition           | 0.8848            | 0.9603           | 0.909             | 0.9064         |
| CYP3A4 substrate            | 0.6182            | 0.8023           | 0.7325            | 0.5643         |
| CYP2D6 substrate            | 0.4228            | 0.7597           | 0.847             | 0.8139         |
| CYP2D6 inhibition           | 0.6408            | 0.9373           | 0.9557            | 0.9361         |
| CYP2C8 inhibition           | 0.8111            | 0.9651           | 0.9807            | 0.6568         |
| CYP inhibitory promiscuity  | 0.7243            | 0.9225           | 0.7747            | 0.7203         |
| Human intestinal absorption | 0.9964            | 0.9965           | 0.9139            | 0.8286         |
| P-gp inhibitor              | 0.9907            | 0.9865           | 0.979             | 0.9527         |
| P-gp substrate              | 0.9394            | 0.9965           | 0.9904            | 0.9829         |
| Skin irritation             | 0.6766            | 0.9432           | 0.5544            | 0.8321         |
| Skin sensitisation          | 0.7992            | 0.9507           | 0.5367            | 0.8479         |
| Skin corrosion              | 0.8569            | 0.9671           | 0.9403            | 0.9721         |
